# Supplementary material
Source: Royal Society of Chemistry journal article supplement (doi:10.1039/d6ew00020g)
Supplement: d6ew00020g1.pdf [file d6ew00020g1.pdf]

## Supporting Information for

### Measles detection in wastewater solids during an outbreak

Abigail P. Paulos<sup>1</sup>, Alessandro Zulli<sup>2</sup>, Amanda Bidwell<sup>2</sup>, Stephen P Hilton<sup>1</sup>, Bridgette Shelden<sup>3</sup>, Dorothea Duong<sup>3</sup>, Alexandria B. Boehm<sup>2\*</sup>, Marlene K. Wolfe<sup>1\*</sup>

<sup>1</sup> Gangarosa Department of Environmental Health, Rollins School of Public Health, Emory University, 1518 Clifton Road, Atlanta, Georgia 30322, United States

<sup>2</sup> Department of Civil and Environmental Engineering, Stanford University, 473 Via Ortega, Stanford, California 94305, United States

<sup>3</sup> Verily Life Sciences LLC, South San Francisco, California 94080, United States

\*Authors to whom correspondence should be addressed:

Marlene Wolfe, [marlene.wolfe@emory.edu](mailto:marlene.wolfe@emory.edu)

Alexandria Boehm, [aboehm@stanford.edu](mailto:aboehm@stanford.edu)

**Additional details on molecular analysis of wastewater samples.** Briefly, solids were isolated from wastewater samples as described in the main text and re-suspended in a buffer at a low enough concentration so as to minimize inhibition (75 mg/ml) and homogenized.<sup>1</sup> Six aliquots of supernatant from each homogenized sample were then subjected to nucleic-acid extraction and purification (Chemagic Viral DNA/RNA 300 Kit H96, PerkinElmer, Shelton, CT), and inhibitor removal (Zymo OneStep PCR Inhibitor Removal Kit, Irvine, CA). Dry weight was determined using another aliquot of solids and drying in an oven.<sup>1</sup>

For retrospective testing, the nucleic acids from the 6 aliquots of each sample were used as template in 6 replicate 1-step RT-ddPCR reaction wells to measure measles RNA using the wild-type measles assay (Table 1). The measles assay (probe labeled using FAM) was run in duplex with an assay for SARS-CoV-2 N gene (probe labeled with hexachlorofluorescein, HEX).<sup>1</sup> For prospective testing, the measles assay was run in multiplex with assays for Dengue virus RNA types 1, 2, 3 and 4, the results of which are not reported herein.

For the prospective testing, nucleic-acids from the 6 aliquots of each sample were each used used neat as template in 10 replicate droplet digital 1-step RT-PCR (RT-ddPCR) reaction wells to measure measles RNA using measles assay (Table 1). Nucleic acids from 4 of the aliquots were run in duplicate to obtain the 10 replicate wells. During pilot testing, the measles assay was run in multiplex with assays for Dengue virus RNA types 1, 2, 3 and 4, the results of which are not reported herein. During national testing, the measles assay was run in multiplex with assays for parvovirus, human adenovirus, and rotavirus, the results of which are not reported herein. The measles assay was run using a probe labeled with the fluorescent molecule fluorescein amidite (FAM).

For both pilot and national testing, negative and positive RT-PCR controls were included on each plate (n=2 and 1 wells, respectively). Synthetic gene blocks (IDT, Coralville, IA) controls

were used as positive controls for B3 and D8 (Table S1) and negative controls used molecular grade water.

Table S1. Gene block sequences for wild type measles genotypes D8 and B3.

|               |                                                                                                                                                                                                                                                                                                                                                  |
|---------------|--------------------------------------------------------------------------------------------------------------------------------------------------------------------------------------------------------------------------------------------------------------------------------------------------------------------------------------------------|
| D8 gene block | ATCTGGCCTCACCTTCGCATCAAGAGGTACCAACATGGAGGATGAGG<br>CGGACCAATACTTTTCACATGATGATCCAAGTAGTAGTGATCAATCCA<br>GGTTCGGATGGTTCGAGAACAAGGAAATCTCAGATATCGAAGTGCAA<br>GACCCTGAGGGATTTAACATGATTCTGGGTACCATTCTAGCCCAAATT<br>TGGGTCTTGCTCGCAAAGGCGGTTACGGCCCCAGACACGGCAGCTGA<br>TTCGGAGCTAAGAAGGTGGATAAAGTACACCCAACAAAGAAGGGTAG<br>TTGGTGAATTTAGATTGGAGAGAAAATG |
| B3 gene block | GCCTTACCTTCGCATCGAGAGGTAATAATATGGAGGATGAGGCGGAC<br>CAGTACTTTTCACATGATGATCCAAGTAGTAGTGATCAATCCAGGTTT<br>GGGTGGTTTGAGAACAAGGAAATCTCAGATATTGAAGTGCAAGACCCT<br>GAGGGCTTCAACATGATTCTGGGTACCATCTTAGCTCAAATTTGGGTC<br>TTGCTCGCAAAGGCGGTTACGGCTCCAGACACAGCAGCTGATTGAGA<br>GCTAAGAAGGTGGATCAAATACACCCAACAAAGAAGAGTAGTTGGTGA<br>ATT                        |

Negative extraction controls and viral RNA recovery controls were also run on the samples. The buffer used for suspending the wastewater solids prior to nucleic-acid extraction was spiked with bovine coronavirus (BCoV) vaccine during the sample processing steps, and nucleic-acid extracts from each sample were assayed for BCoV RNA following methods described elsewhere to calculate BCoV RNA recovery (measured BCoV divided by added BCoV).<sup>1</sup> Nucleic-acid extracts from the buffer were also used as template for negative extraction controls as they are not expected to contain measles or SARS-CoV-2 RNA targets. The negative and positive controls were run in separate plates that assayed a wide variety of pathogen biomarkers measured prospectively (within 48 h of sample receipt in the lab), as described by Boehm et al.<sup>1</sup>

Digital droplet RT-PCR was performed on 20 µl samples from a 22 µl reaction volume, prepared using 5.5 µl template mixed with 5.5 µl of One-Step RT-ddPCR Advanced kit for Probes (catalog no. 1863021; Bio-Rad), 2.2 µl reverse transcriptase, 1.1 µl dithiothreitol (DTT), and primers and probes at a final concentration of 900 nM and 250 nM, respectively. Droplets were generated using the AutoDG Automated Droplet Generator (Bio-Rad).

PCR was performed using Mastercycler Pro (Eppendorf, Enfield, CT) thermocycler with the following protocol: reverse transcription at 50 °C for 60 min, enzyme activation at 95 °C for 5 min, 40 cycles with 1 cycle consisting of denaturation at 95 °C for 30 s and annealing and extension at 59 °C for 30 s, enzyme deactivation at 98 °C for 10 min, and then an indefinite hold at 4 °C. The ramp rate for temperature changes was set at 2 °C/s, and the final hold at 4 °C was performed for a minimum of 30 min to allow the droplets to stabilize. Droplets were analyzed

using the QX200 (retrospective analyses) or QX600 (prospective analyses) Droplet Reader (Bio-Rad). All liquid transfers were performed using the Agilent Bravo (Agilent Technologies).

A well had to have over 10,000 droplets for inclusion in the analysis. Results from replicate wells were merged for analysis. Concentrations of the targets in wastewater samples are presented as copies per gram dry weight. For a sample to be scored as a positive, there had to be at least 3 positive droplets across the merged wells. The lowest measurable concentration is approximately 1000 copies/g dry weight (corresponds to three positive droplets across 6 to 10 merged wells). Errors are reported as standard deviations of the measurements as obtained from vendor's software.

**Additional details on sites included in national prospective monitoring.**

The 147 sites included in prospective national monitoring, including sample collection methods, have been described in detail elsewhere.<sup>1</sup> Table S2 describes all sites, the counties they serve, and adjacent counties.

Table S2. Sites included in the national prospective monitoring program May - November, 2025.

| Plant                      | Population | County                              | Adjacent Counties                                                                                                                                                     |
|----------------------------|------------|-------------------------------------|-----------------------------------------------------------------------------------------------------------------------------------------------------------------------|
| Union Beach, NJ            | 1.00E+05   | Middlesex (34023), Monmouth (34025) | Union (34039), Burlington (34005), Richmond (36085), Somerset (34035), Ocean (34029), Queens (36081), Mercer (34021)                                                  |
| Redwood City, CA           | 199000     | San Mateo (06081)                   | San Francisco (06075), Santa Clara (06085), Alameda (06001), Santa Cruz (06087)                                                                                       |
| Napa, CA                   | 83300      | Napa (06055)                        | Sonoma (06097), Solano (06095), Yolo (06113), Lake (06033)                                                                                                            |
| Hollywood, MD              | 55000      | St. Mary's (24037)                  | Northumberland (51133), Calvert (24009), Dorchester (24019), Somerset (24039), Accomack (51001), Westmoreland (51193), Charles (24017)                                |
| Bloomington, IN            | 56090      | Monroe (18105)                      | Greene (18055), Owen (18119), Brown (18013), Morgan (18109), Jackson (18071), Lawrence (18093)                                                                        |
| Snohomish, WA              | 10150      | Snohomish (53061)                   | Island (53029), Chelan (53007), King (53033), Kitsap (53035), Skagit (53057)                                                                                          |
| Ann Arbor, MI              | 125000     | Washtenaw (26161)                   | Wayne (26163), Jackson (26075), Ingham (26065), Livingston (26093), Monroe (26115), Oakland (26125), Lenawee (26091)                                                  |
| Mt. Pleasant, MI           | 21690      | Isabella (26073)                    | Clare (26035), Gratiot (26057), Mecosta (26107), Montcalm (26117), Gladwin (26051), Midland (26111), Osceola (26133)                                                  |
| Johns Creek, Roswell, GA   | 84486      | Fulton (13121)                      | Clayton (13063), DeKalb (13089), Carroll (13045), Fayette (13113), Coweta (13077), Douglas (13097), Gwinnett (13135), Cobb (13067), Cherokee (13057), Forsyth (13117) |
| South, Laredo, TX          | 120000     | Webb (48479)                        | Jim Hogg (48247), Dimmit (48127), McMullen (48311), Duval (48131), Maverick (48323), La Salle (48283), Zapata (48505)                                                 |
| Memphis, TN                | 3.00E+05   | Shelby (47157)                      | Mississippi (05093), Marshall (28093), Crittenden (05035), Tipton (47167), DeSoto (28033), Fayette (47047)                                                            |
| Wolcott, Kansas City, KS   | 15000      | Wyandotte (20209)                   | Platte (29165), Johnson (20091), Jackson (29095), Clay (29047), Leavenworth (20103)                                                                                   |
| East Bank, New Orleans, LA | 333406     | Orleans (22071)                     | St. Bernard (22087), Plaquemines (22075), Jefferson (22051), St. Tammany (22103)                                                                                      |
| Columbus, GA               | 278000     | Muscogee (13215)                    | Harris (13145), Lee (01081), Chattahoochee (13053), Talbot (13263), Russell (01113)                                                                                   |

|                        |        |                                    |                                                                                                                                                                       |
|------------------------|--------|------------------------------------|-----------------------------------------------------------------------------------------------------------------------------------------------------------------------|
| Jenison, MI            | 75000  | Ottawa (26139)                     | Milwaukee (55079), Racine (55101), Kent (26081), Allegan (26005), Muskegon (26121)                                                                                    |
| North Miami, FL        | 776150 | Miami-Dade (12086)                 | Broward (12011), Monroe (12087), Collier (12021)                                                                                                                      |
| Stamford, CT           | 140000 | Fairfield (09001)                  | Suffolk (36103), Dutchess (36027), Nassau (36059), Westchester (36119), New Haven (09009), Putnam (36079), Litchfield (09005)                                         |
| Portland, ME           | 65000  | Cumberland (23005)                 | Androscoggin (23001), Sagadahoc (23023), York (23031), Oxford (23017)                                                                                                 |
| Winston-Salem, NC      | 92000  | Forsyth (37067)                    | Davidson (37057), Stokes (37169), Guilford (37081), Yadkin (37197), Davie (37059), Rockingham (37157), Surry (37171)                                                  |
| Big Creek, Roswell, GA | 189593 | Fulton (13121)                     | Clayton (13063), DeKalb (13089), Carroll (13045), Fayette (13113), Coweta (13077), Douglas (13097), Gwinnett (13135), Cobb (13067), Cherokee (13057), Forsyth (13117) |
| Muscatine, IA          | 24400  | Louisa (19115), Muscatine (19139)  | Cedar (19031), Mercer (17131), Rock Island (17161), Johnson (19103), Des Moines (19057), Scott (19163), Henry (19087), Henderson (17071), Washington (19183)          |
| Northeast, Lincoln, NE | 60000  | Lancaster (31109)                  | Saline (31151), Otoe (31131), Cass (31025), Gage (31067), Johnson (31097), Saunders (31155), Seward (31159), Butler (31023)                                           |
| Warren, MI             | 140000 | Macomb (26099)                     | Wayne (26163), Lapeer (26087), St. Clair (26147), Oakland (26125)                                                                                                     |
| Bridgewater, NJ        | 130000 | Somerset (34035)                   | Union (34039), Middlesex (34023), Morris (34027), Hunterdon (34019), Mercer (34021)                                                                                   |
| Carmel, IN             | 86000  | Hamilton (18057)                   | Clinton (18023), Hancock (18059), Tipton (18159), Boone (18011), Madison (18095), Marion (18097)                                                                      |
| Jupiter, FL            | 90000  | Martin (12085), Palm Beach (12099) | Hendry (12051), Broward (12011), Okeechobee (12093), Glades (12043), St. Lucie (12111)                                                                                |
| Lewiston, ME           | 60000  | Androscoggin (23001)               | Sagadahoc (23023), Kennebec (23011), Oxford (23017), Cumberland (23005), Franklin (23007)                                                                             |
| Traverse City, MI      | 30623  | Grand Traverse (26055)             | Leelanau (26089), Antrim (26009), Kalkaska (26079), Benzie (26019), Wexford (26165), Manistee (26101), Missaukee (26113)                                              |
| Chester, PA            | 220000 | Delaware (42045)                   | New Castle (10003), Philadelphia (42101), Chester (42029), Gloucester (34015), Montgomery (42091), Salem (34033)                                                      |
| Rochester, MN          | 120000 | Olmsted (27109)                    | Fillmore (27045), Dodge (27039), Winona (27169), Goodhue (27049), Mower (27099), Wabasha (27157)                                                                      |

|                                    |          |                                  |                                                                                                                                                                                                        |
|------------------------------------|----------|----------------------------------|--------------------------------------------------------------------------------------------------------------------------------------------------------------------------------------------------------|
| Oakhurst, NJ                       | 50000    | Monmouth (34025)                 | Burlington (34005), Middlesex (34023), Richmond (36085), Ocean (34029), Queens (36081), Mercer (34021)                                                                                                 |
| Marina, CA                         | 262000   | Monterey (06053)                 | Kings (06031), San Benito (06069), Fresno (06019), Santa Cruz (06087), San Luis Obispo (06079)                                                                                                         |
| Woodlands SJRA<br>WWTF No. 1, TX   | 65000    | Montgomery (48339)               | San Jacinto (48407), Waller (48473), Walker (48471), Harris (48201), Grimes (48185), Liberty (48291)                                                                                                   |
| Mankato, MN                        | 70000    | Blue Earth (27013)               | Waseca (27161), Watonwan (27165), Le Sueur (27079), Faribault (27043), Martin (27091), Brown (27015), Nicollet (27103)                                                                                 |
| Theresa Street,<br>Lincoln, NE     | 240000   | Lancaster (31109)                | Saline (31151), Otoe (31131), Cass (31025), Gage (31067), Johnson (31097), Saunders (31155), Seward (31159), Butler (31023)                                                                            |
| Zacate Creek,<br>Laredo, TX        | 140000   | Webb (48479)                     | Jim Hogg (48247), Dimmit (48127), McMullen (48311), Duval (48131), Maverick (48323), La Salle (48283), Zapata (48505)                                                                                  |
| Chattanooga, TN                    | 4.00E+05 | Marion (47115), Hamilton (47065) | Grundy (47061), Jackson (01071), Sequatchie (47153), Catoosa (13047), Rhea (47143), Bradley (47011), Meigs (47121), Walker (13295), Bledsoe (47007), Franklin (47051), Whitfield (13313), Dade (13083) |
| San Diego, CA                      | 2200000  | San Diego (06073)                | Riverside (06065), Orange (06059), Imperial (06025)                                                                                                                                                    |
| Coralville, IA                     | 23000    | Johnson (19103)                  | Cedar (19031), Benton (19011), Linn (19113), Iowa (19095), Louisa (19115), Muscatine (19139), Washington (19183)                                                                                       |
| Southwest, Saint<br>Petersburg, FL | 47790    | Pinellas (12103)                 | Pasco (12101), Hillsborough (12057)                                                                                                                                                                    |
| Northwest, Orange<br>County, FL    | 66690    | Orange (12095)                   | Volusia (12127), Lake (12069), Seminole (12117), Polk (12105), Osceola (12097), Brevard (12009)                                                                                                        |
| Youngstown, OH                     | 174000   | Mahoning (39099)                 | Portage (39133), Trumbull (39155), Lawrence (42073), Mercer (42085), Stark (39151), Columbiana (39029)                                                                                                 |
| Vallejo, CA                        | 121000   | Solano (06095)                   | Sacramento (06067), Sonoma (06097), Marin (06041), Napa (06055), Contra Costa (06013), Yolo (06113)                                                                                                    |
| Anchorage, AK                      | 220000   | Anchorage (02020)                | Kenai Peninsula (02122), Matanuska-Susitna (02170), Chugach (02063)                                                                                                                                    |
| Jackson, MI                        | 90000    | Jackson (26075)                  | Ingham (26065), Livingston (26093), Washtenaw (26161), Hillsdale (26059), Calhoun (26025), Eaton (26045), Lenawee (26091)                                                                              |
| West Bank, New<br>Orleans, LA      | 50591    | Orleans (22071)                  | St. Bernard (22087), Plaquemines (22075), Jefferson (22051), St. Tammany (22103)                                                                                                                       |

|                                |         |                                  |                                                                                                                                                                                                                      |
|--------------------------------|---------|----------------------------------|----------------------------------------------------------------------------------------------------------------------------------------------------------------------------------------------------------------------|
| Montpelier, VT                 | 10100   | Washington (50023)               | Orange (50017), Lamoille (50015), Caledonia (50005), Chittenden (50007), Addison (50001)                                                                                                                             |
| Sacramento, CA                 | 1480000 | Yolo (06113), Sacramento (06067) | Placer (06061), Napa (06055), Solano (06095), Contra Costa (06013), El Dorado (06017), Colusa (06011), San Joaquin (06077), Sutter (06101), Amador (06005), Lake (06033)                                             |
| Lander Street, Boise, ID       | 97237   | Gem (16045), Ada (16001)         | Elmore (16039), Adams (16003), Valley (16085), Boise (16015), Payette (16075), Owyhee (16073), Washington (16087), Canyon (16027)                                                                                    |
| South Burlington, VT           | 16000   | Chittenden (50007)               | Franklin (50011), Essex (36031), Clinton (36019), Lamoille (50015), Grand Isle (50013), Washington (50023), Addison (50001)                                                                                          |
| Cahaba River, Birmingham, AL   | 95000   | Jefferson (01073)                | Tuscaloosa (01125), Blount (01009), St. Clair (01115), Shelby (01117), Walker (01127), Bibb (01007)                                                                                                                  |
| Little River, Roswell, GA      | 12818   | Cherokee (13057), Fulton (13121) | Clayton (13063), DeKalb (13089), Pickens (13227), Carroll (13045), Gordon (13129), Fayette (13113), Bartow (13015), Coweta (13077), Dawson (13085), Douglas (13097), Gwinnett (13135), Cobb (13067), Forsyth (13117) |
| Wheaton, IL                    | 63000   | DuPage (17043)                   | Kendall (17093), Cook (17031), Kane (17089), Will (17197)                                                                                                                                                            |
| North, Parker, CO              | 35000   | Douglas (08035)                  | Park (08093), Jefferson (08059), El Paso (08041), Teller (08119), Elbert (08039), Arapahoe (08005)                                                                                                                   |
| Salina, KS                     | 47000   | Saline (20169)                   | McPherson (20113), Marion (20115), Lincoln (20105), Ottawa (20143), Dickinson (20041), Ellsworth (20053)                                                                                                             |
| White Rock Central, Dallas, TX | 630000  | Dallas (48113)                   | Rockwall (48397), Kaufman (48257), Tarrant (48439), Ellis (48139), Collin (48085), Denton (48121)                                                                                                                    |
| Yankton, SD                    | 20000   | Yankton (46135)                  | Hutchinson (46067), Clay (46027), Bon Homme (46009), Turner (46125), Cedar (31027), Knox (31107)                                                                                                                     |
| Glen Ellyn, IL                 | 86000   | DuPage (17043)                   | Kendall (17093), Cook (17031), Kane (17089), Will (17197)                                                                                                                                                            |
| Oswego, NY                     | 30000   | Oswego (36075)                   | Cayuga (36011), Jefferson (36045), Madison (36053), Lewis (36049), Oneida (36065), Onondaga (36067)                                                                                                                  |
| River Road, Amarillo, TX       | 140000  | Randall (48381), Potter (48375)  | Armstrong (48011), Oldham (48359), Carson (48065), Swisher (48437), Deaf Smith (48117), Hutchinson (48233), Castro (48069), Moore (48341), Hartley (48205)                                                           |
| Paso Robles, CA                | 31037   | San Luis Obispo (06079)          | Santa Barbara (06083), Kings (06031), Monterey (06053), Kern (06029)                                                                                                                                                 |
| Kaw Point, Kansas City, KS     | 90000   | Wyandotte (20209)                | Platte (29165), Johnson (20091), Jackson (29095), Clay (29047), Leavenworth (20103)                                                                                                                                  |

|                                 |          |                                 |                                                                                                                                                                       |
|---------------------------------|----------|---------------------------------|-----------------------------------------------------------------------------------------------------------------------------------------------------------------------|
| Palo Alto, CA                   | 236000   | Santa Clara (06085)             | San Benito (06069), San Joaquin (06077), Alameda (06001), Merced (06047), Stanislaus (06099), San Mateo (06081), Santa Cruz (06087)                                   |
| Sand Island, Honolulu, HI       | 390000   | Honolulu (15003)                | NA                                                                                                                                                                    |
| South Bend, IN                  | 130000   | St. Joseph (18141)              | Marshall (18099), LaPorte (18091), Berrien (26021), Elkhart (18039), Starke (18149), Cass (26027)                                                                     |
| Sunnyvale, CA                   | 153000   | Santa Clara (06085)             | San Benito (06069), San Joaquin (06077), Alameda (06001), Merced (06047), Stanislaus (06099), San Mateo (06081), Santa Cruz (06087)                                   |
| Honouliuli, Honolulu, HI        | 3.00E+05 | Honolulu (15003)                | NA                                                                                                                                                                    |
| Hollywood Road, Amarillo, TX    | 60000    | Potter (48375), Randall (48381) | Armstrong (48011), Oldham (48359), Carson (48065), Swisher (48437), Deaf Smith (48117), Hutchinson (48233), Castro (48069), Moore (48341), Hartley (48205)            |
| Northwest, Saint Petersburg, FL | 94218    | Pinellas (12103)                | Pasco (12101), Hillsborough (12057)                                                                                                                                   |
| Aquia, Stafford, VA             | 1.00E+05 | Stafford (51179)                | Fauquier (51061), Prince William (51153), Charles (24017), Fredericksburg (51630), King George (51099), Culpeper (51047), Spotsylvania (51177), Caroline (51033)      |
| Lawrence, KS                    | 80000    | Douglas (20045)                 | Osage (20139), Franklin (20059), Johnson (20091), Shawnee (20177), Miami (20121), Jefferson (20087), Leavenworth (20103)                                              |
| Akron, OH                       | 365000   | Summit (39153)                  | Portage (39133), Wayne (39169), Stark (39151), Geauga (39055), Cuyahoga (39035), Medina (39103)                                                                       |
| Davis, CA                       | 68000    | Yolo (06113)                    | Sacramento (06067), Napa (06055), Solano (06095), Colusa (06011), Sutter (06101), Lake (06033)                                                                        |
| Louisville, KY                  | 423913   | Jefferson (21111)               | Floyd (18043), Harrison (18061), Clark (18019), Bullitt (21029), Shelby (21211), Hardin (21093), Oldham (21185), Spencer (21215)                                      |
| Southside, Dallas, TX           | 421700   | Dallas (48113)                  | Rockwall (48397), Kaufman (48257), Tarrant (48439), Ellis (48139), Collin (48085), Denton (48121)                                                                     |
| College Park, GA                | 73821    | Fulton (13121)                  | Clayton (13063), DeKalb (13089), Carroll (13045), Fayette (13113), Coweta (13077), Douglas (13097), Gwinnett (13135), Cobb (13067), Cherokee (13057), Forsyth (13117) |
| Santa Rosa, CA                  | 230000   | Sonoma (06097)                  | Marin (06041), Napa (06055), Mendocino (06045), Solano (06095), Contra Costa (06013), Lake (06033)                                                                    |
| Woodlands SJRA WWTF No. 2, TX   | 70000    | Montgomery (48339)              | San Jacinto (48407), Waller (48473), Walker (48471), Harris (48201), Grimes (48185), Liberty (48291)                                                                  |

|                                |          |                                               |                                                                                                                                                                  |
|--------------------------------|----------|-----------------------------------------------|------------------------------------------------------------------------------------------------------------------------------------------------------------------|
| Southeast San Francisco, CA    | 750000   | San Francisco (06075)                         | Marin (06041), Contra Costa (06013), Alameda (06001), San Mateo (06081)                                                                                          |
| Provo, UT                      | 115000   | Utah (49049)                                  | Duchesne (49013), Salt Lake (49035), Juab (49023), Carbon (49007), Sanpete (49039), Wasatch (49051), Tooele (49045)                                              |
| Sunnyvale, TX                  | 186000   | Dallas (48113)                                | Rockwall (48397), Kaufman (48257), Tarrant (48439), Ellis (48139), Collin (48085), Denton (48121)                                                                |
| Wheeling, WV                   | 1.00E+05 | Marshall (54051), Ohio (54069)                | Wetzel (54103), Greene (42059), Monroe (39111), Jefferson (39081), Belmont (39013), Brooke (54009), Washington (42125)                                           |
| Ontario, CA                    | 890000   | San Bernardino (06071)                        | Clark (32003), Los Angeles (06037), Inyo (06027), Riverside (06065), Kern (06029), Mohave (04015), La Paz (04012), Orange (06059)                                |
| Little Falls Run, Stafford, VA | 50000    | Stafford (51179)                              | Fauquier (51061), Prince William (51153), Charles (24017), Fredericksburg (51630), King George (51099), Culpeper (51047), Spotsylvania (51177), Caroline (51033) |
| Pinson, AL                     | 30000    | Jefferson (01073)                             | Tuscaloosa (01125), Blount (01009), St. Clair (01115), Shelby (01117), Walker (01127), Bibb (01007)                                                              |
| Gilroy, CA                     | 110338   | Santa Clara (06085)                           | San Benito (06069), San Joaquin (06077), Alameda (06001), Merced (06047), Stanislaus (06099), San Mateo (06081), Santa Cruz (06087)                              |
| Harrison, AR                   | 15000    | Newton (05101), Boone (05009)                 | Carroll (05015), Johnson (05071), Searcy (05129), Taney (29213), Madison (05087), Pope (05115), Marion (05089)                                                   |
| Woodland, CA                   | 59000    | Yolo (06113)                                  | Sacramento (06067), Napa (06055), Solano (06095), Colusa (06011), Sutter (06101), Lake (06033)                                                                   |
| Gautier, MS                    | 19008    | Jackson (28059)                               | Mobile (01097), Stone (28131), George (28039), Harrison (28047)                                                                                                  |
| Las Vegas, NV                  | 1250000  | Clark (32003)                                 | Nye (32023), Inyo (06027), San Bernardino (06071), Mohave (04015), Lincoln (32017)                                                                               |
| Bessemer, AL                   | 225000   | Jefferson (01073)                             | Tuscaloosa (01125), Blount (01009), St. Clair (01115), Shelby (01117), Walker (01127), Bibb (01007)                                                              |
| South, Orange County, FL       | 183009   | Orange (12095)                                | Volusia (12127), Lake (12069), Seminole (12117), Polk (12105), Osceola (12097), Brevard (12009)                                                                  |
| Wichita Falls, TX              | 90000    | Archer (48009), Wichita (48485), Clay (48077) | Jack (48237), Cotton (40033), Tillman (40141), Montague (48337), Young (48503), Baylor (48023), Jefferson (40067), Throckmorton (48447), Wilbarger (48487)       |
| Los Angeles, CA                | 4.00E+06 | Los Angeles (06037)                           | Ventura (06111), San Bernardino (06071), Kern (06029), Orange (06059)                                                                                            |

|                               |          |                                                     |                                                                                                                                                                                        |
|-------------------------------|----------|-----------------------------------------------------|----------------------------------------------------------------------------------------------------------------------------------------------------------------------------------------|
| Village Creek, Birmingham, AL | 2.00E+05 | Jefferson (01073)                                   | Tuscaloosa (01125), Blount (01009), St. Clair (01115), Shelby (01117), Walker (01127), Bibb (01007)                                                                                    |
| Bridgeton, NJ                 | 50000    | Salem (34033), Cumberland (34011)                   | New Castle (10003), Cape May (34009), Gloucester (34015), Delaware (42045), Kent (10001), Atlantic (34001)                                                                             |
| Dallas Central, Dallas, TX    | 270000   | Dallas (48113)                                      | Rockwall (48397), Kaufman (48257), Tarrant (48439), Ellis (48139), Collin (48085), Denton (48121)                                                                                      |
| Garland, TX                   | 2.00E+05 | Dallas (48113)                                      | Rockwall (48397), Kaufman (48257), Tarrant (48439), Ellis (48139), Collin (48085), Denton (48121)                                                                                      |
| Los Angeles County, CA        | 3500000  | Los Angeles (06037)                                 | Ventura (06111), San Bernardino (06071), Kern (06029), Orange (06059)                                                                                                                  |
| San Rafael, CA                | 104250   | Marin (06041)                                       | Sonoma (06097), San Francisco (06075), Solano (06095), Contra Costa (06013)                                                                                                            |
| Hagerstown, MD                | 90000    | Washington (24043)                                  | Allegany (24001), Fulton (42057), Frederick (24021), Jefferson (54037), Berkeley (54003), Adams (42001), Franklin (42055), Loudoun (51107), Morgan (54065)                             |
| Merced, CA                    | 91000    | Merced (06047)                                      | Mariposa (06043), Tuolumne (06109), San Benito (06069), Fresno (06019), Madera (06039), Santa Clara (06085), Stanislaus (06099)                                                        |
| Novato, CA                    | 53000    | Marin (06041)                                       | Sonoma (06097), San Francisco (06075), Solano (06095), Contra Costa (06013)                                                                                                            |
| Red Wing, MN                  | 16000    | Goodhue (27049)                                     | Pierce (55093), Dodge (27039), Olmsted (27109), Dakota (27037), Wabasha (27157), Rice (27131), Pepin (55091), Steele (27147)                                                           |
| Utoy Creek, Atlanta, GA       | 70887    | Fulton (13121)                                      | Clayton (13063), DeKalb (13089), Carroll (13045), Fayette (13113), Coweta (13077), Douglas (13097), Gwinnett (13135), Cobb (13067), Cherokee (13057), Forsyth (13117)                  |
| Boston, MA                    | 2400000  | Suffolk (25025), Norfolk (25021), Middlesex (25017) | Worcester (25027), Bristol (25005), Providence (44007), Hillsborough (33011), Essex (25009), Plymouth (25023)                                                                          |
| Turlock, CA                   | 86000    | Stanislaus (06099)                                  | Calaveras (06009), Mariposa (06043), Tuolumne (06109), Santa Clara (06085), San Joaquin (06077), Alameda (06001), Merced (06047)                                                       |
| RM Clayton, Atlanta, GA       | 294660   | Fulton (13121), DeKalb (13089)                      | Clayton (13063), Carroll (13045), Fayette (13113), Coweta (13077), Henry (13151), Douglas (13097), Gwinnett (13135), Rockdale (13247), Cobb (13067), Cherokee (13057), Forsyth (13117) |
| West Boise, ID                | 206629   | Boise (16015), Ada (16001)                          | Gem (16045), Custer (16037), Elmore (16039), Valley (16085), Owyhee (16073), Canyon (16027)                                                                                            |
| San Jose, CA                  | 1500000  | Santa Clara (06085)                                 | San Benito (06069), San Joaquin (06077), Alameda (06001), Merced (06047), Stanislaus (06099), San Mateo (06081), Santa Cruz (06087)                                                    |

|                              |        |                               |                                                                                                                                                                                        |
|------------------------------|--------|-------------------------------|----------------------------------------------------------------------------------------------------------------------------------------------------------------------------------------|
| Millbury, MA                 | 250000 | Worcester (25027)             | Hampshire (25015), Cheshire (33005), Hampden (25013), Tolland (09013), Middlesex (25017), Windham (09015), Providence (44007), Hillsborough (33011), Norfolk (25021), Franklin (25011) |
| South, Parker, CO            | 25000  | Douglas (08035)               | Park (08093), Jefferson (08059), El Paso (08041), Teller (08119), Elbert (08039), Arapahoe (08005)                                                                                     |
| Kinston, NC                  | 25000  | Jones (37103), Lenoir (37107) | Carteret (37031), Craven (37049), Duplin (37061), Greene (37079), Pitt (37147), Onslow (37133), Wayne (37191)                                                                          |
| Lompoc, CA                   | 69290  | Santa Barbara (06083)         | Ventura (06111), Kern (06029), San Luis Obispo (06079)                                                                                                                                 |
| Downtown, Jeffersonville, IN | 25000  | Clark (18019)                 | Scott (18143), Jefferson (18077), Floyd (18043), Jefferson (21111), Oldham (21185), Trimble (21223), Washington (18175)                                                                |
| North, Jeffersonville, IN    | 25000  | Clark (18019)                 | Scott (18143), Jefferson (18077), Floyd (18043), Jefferson (21111), Oldham (21185), Trimble (21223), Washington (18175)                                                                |
| Santa Cruz, CA               | 160000 | Santa Cruz (06087)            | Monterey (06053), San Benito (06069), Santa Clara (06085), San Mateo (06081)                                                                                                           |
| Riverside, CA                | 350000 | Riverside (06065)             | San Diego (06073), San Bernardino (06071), La Paz (04012), Orange (06059), Imperial (06025)                                                                                            |
| Coeur d'Alene, ID            | 50540  | Kootenai (16055)              | Benewah (16009), Spokane (53063), Bonner (16017), Shoshone (16079)                                                                                                                     |
| Oceanside, San Francisco, CA | 250000 | San Francisco (06075)         | Marin (06041), Contra Costa (06013), Alameda (06001), San Mateo (06081)                                                                                                                |
| Pascagoula Moss Point, MS    | 34333  | Jackson (28059)               | Mobile (01097), Stone (28131), George (28039), Harrison (28047)                                                                                                                        |
| Essex Junction, VT           | 30000  | Chittenden (50007)            | Franklin (50011), Essex (36031), Clinton (36019), Lamoille (50015), Grand Isle (50013), Washington (50023), Addison (50001)                                                            |
| Ithaca, NY                   | 90000  | Tompkins (36109)              | Schuyler (36097), Cayuga (36011), Cortland (36023), Tioga (36107), Seneca (36099), Chemung (36015)                                                                                     |
| Fultondale, AL               | 77000  | Jefferson (01073)             | Tuscaloosa (01125), Blount (01009), St. Clair (01115), Shelby (01117), Walker (01127), Bibb (01007)                                                                                    |
| Ottumwa, IA                  | 25529  | Wapello (19179)               | Jefferson (19101), Mahaska (19123), Appanoose (19007), Van Buren (19177), Keokuk (19107), Davis (19051), Monroe (19135)                                                                |
| Eastern, Orange County, FL   | 195299 | Orange (12095)                | Volusia (12127), Lake (12069), Seminole (12117), Polk (12105), Osceola (12097), Brevard (12009)                                                                                        |

|                                 |          |                                                                |                                                                                                                                                                        |
|---------------------------------|----------|----------------------------------------------------------------|------------------------------------------------------------------------------------------------------------------------------------------------------------------------|
| Fremont, CA                     | 229476   | Alameda (06001)                                                | San Francisco (06075), Contra Costa (06013), Santa Clara (06085), San Joaquin (06077), Stanislaus (06099), San Mateo (06081)                                           |
| Tallahassee, FL                 | 212065   | Leon (12073)                                                   | Wakulla (12129), Jefferson (12065), Thomas (13275), Liberty (12077), Grady (13131), Gadsden (12039)                                                                    |
| Belmar, NJ                      | 52672    | Monmouth (34025)                                               | Burlington (34005), Middlesex (34023), Richmond (36085), Ocean (34029), Queens (36081), Mercer (34021)                                                                 |
| Dover, NH                       | 30000    | Strafford (33017)                                              | Merrimack (33013), York (23031), Carroll (33003), Rockingham (33015), Belknap (33001)                                                                                  |
| Wausau, WI                      | 44000    | Marathon (55073)                                               | Waupaca (55135), Portage (55097), Langlade (55067), Taylor (55119), Shawano (55115), Wood (55141), Lincoln (55069), Clark (55019)                                      |
| Seaford, DE                     | 13172    | Sussex (10005)                                                 | Worcester (24047), Cape May (34009), Dorchester (24019), Wicomico (24045), Caroline (24011), Kent (10001)                                                              |
| Newark, NJ                      | 1500000  | Bergen (34003), Passaic (34031), Hudson (34017), Essex (34013) | Sussex (34037), Union (34039), Westchester (36119), Richmond (36085), Morris (34027), Kings (36047), New York (36061), Rockland (36087), Orange (36071), Bronx (36005) |
| Key Biscayne, FL                | 829725   | Miami-Dade (12086)                                             | Broward (12011), Monroe (12087), Collier (12021)                                                                                                                       |
| Bangor, ME                      | 40000    | Penobscot (23019)                                              | Washington (23029), Waldo (23027), Piscataquis (23021), Hancock (23009), Aroostook (23003), Somerset (23025)                                                           |
| Southwest, Orange County, FL    | 50000    | Lake (12069), Orange (12095)                                   | Volusia (12127), Sumter (12119), Seminole (12117), Polk (12105), Osceola (12097), Marion (12083), Brevard (12009)                                                      |
| Indio, CA                       | 91765    | Riverside (06065)                                              | San Diego (06073), San Bernardino (06071), La Paz (04012), Orange (06059), Imperial (06025)                                                                            |
| Central Salt Lake Valley, UT    | 6.00E+05 | Salt Lake (49035)                                              | Davis (49011), Morgan (49029), Summit (49043), Utah (49049), Wasatch (49051), Tooele (49045)                                                                           |
| Marshalltown, IA                | 27400    | Marshall (19127)                                               | Poweshiek (19157), Story (19169), Grundy (19075), Hardin (19083), Jasper (19099), Tama (19171)                                                                         |
| St. Cloud, MN                   | 120000   | Stearns (27145)                                                | Todd (27153), Pope (27121), Kandiyohi (27067), Wright (27171), Meeker (27093), Benton (27009), Sherburne (27141), Morrison (27097), Douglas (27041)                    |
| Northeast, Saint Petersburg, FL | 89847    | Pinellas (12103)                                               | Pasco (12101), Hillsborough (12057)                                                                                                                                    |
| Clinton, IA                     | 29300    | Clinton (19045)                                                | Cedar (19031), Rock Island (17161), Jackson (19097), Jones (19105), Scott (19163), Whiteside (17195), Carroll (17015)                                                  |

|                             |        |                                                    |                                                                                                                                                                                            |
|-----------------------------|--------|----------------------------------------------------|--------------------------------------------------------------------------------------------------------------------------------------------------------------------------------------------|
| Harrisburg, PA              | 125000 | Dauphin (42043)                                    | Perry (42099), Schuylkill (42107), Northumberland (42097), York (42133), Juniata (42067), Cumberland (42041), Lebanon (42075), Lancaster (42071)                                           |
| Wilson, NC                  | 50000  | Wilson (37195)                                     | Johnston (37101), Greene (37079), Pitt (37147), Edgecombe (37065), Wayne (37191), Nash (37127)                                                                                             |
| Gainesville, TX             | 17300  | Cooke (48097)                                      | Grayson (48181), Love (40085), Wise (48497), Montague (48337), Denton (48121)                                                                                                              |
| South River,<br>Atlanta, GA | 105160 | DeKalb (13089), Clayton (13063),<br>Fulton (13121) | Carroll (13045), Fayette (13113), Coweta (13077), Henry (13151), Douglas (13097), Gwinnett (13135),<br>Rockdale (13247), Cobb (13067), Cherokee (13057), Spalding (13255), Forsyth (13117) |
| P20, Kansas City,<br>KS     | 35000  | Wyandotte (20209)                                  | Platte (29165), Johnson (20091), Jackson (29095), Clay (29047), Leavenworth (20103)                                                                                                        |

Codes beside county names represent FIPS codes

**Additional details related to EMMI guidelines.** The retrospective samples had an average (standard deviation) droplets across the 6 replicate wells of 96,265 (20,913). The volume per droplet, as reported by the manufacturer, is 0.00085  $\mu$ L. The average (standard deviation) copies per droplet of MeV was  $4.5 \times 10^{-5}$  ( $2.6 \times 10^{-4}$ ). For the prospective sampling, the average (standard deviation) droplets was 188,187 (17,139). The average (standard deviation) copies per droplet was  $1.1 \times 10^{-6}$  ( $7.3 \times 10^{-6}$ ).

For an example fluorescence plot, see Boehm *et al.*<sup>1</sup>

Fig S3 includes the EMMI checklist.

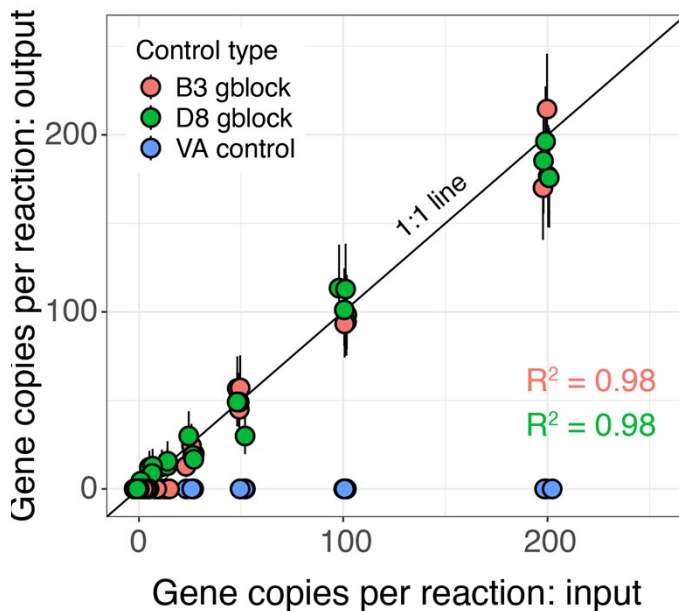

Figure S1. Sensitivity testing using the wild-type specific measles assay. Expected concentrations based on preparation of control material and measured concentrations with and without the RT step for digital PCR. Error bars represent the standard deviation. If error bars cannot be seen, they are smaller than the symbols. VA represents the vaccine sequence.

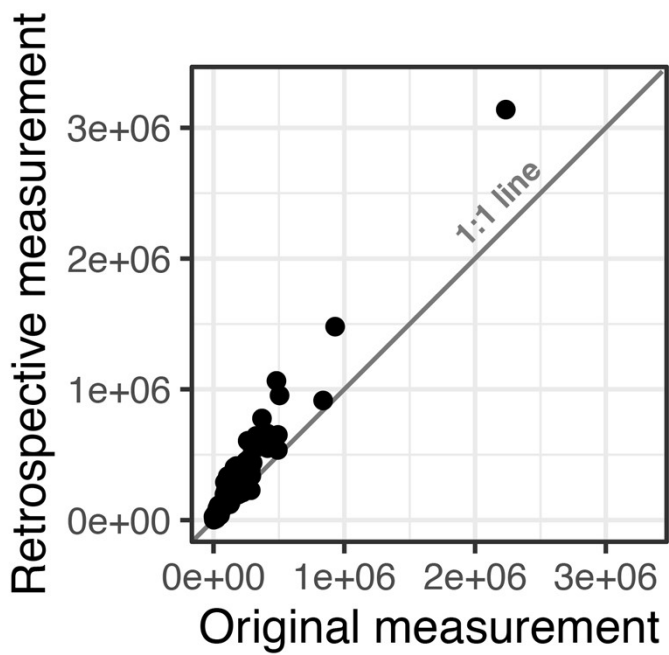

Figure S2. SARS-CoV-2 N gene measurements taken immediately after sample collection and at the time of retrospective testing for pilot samples.

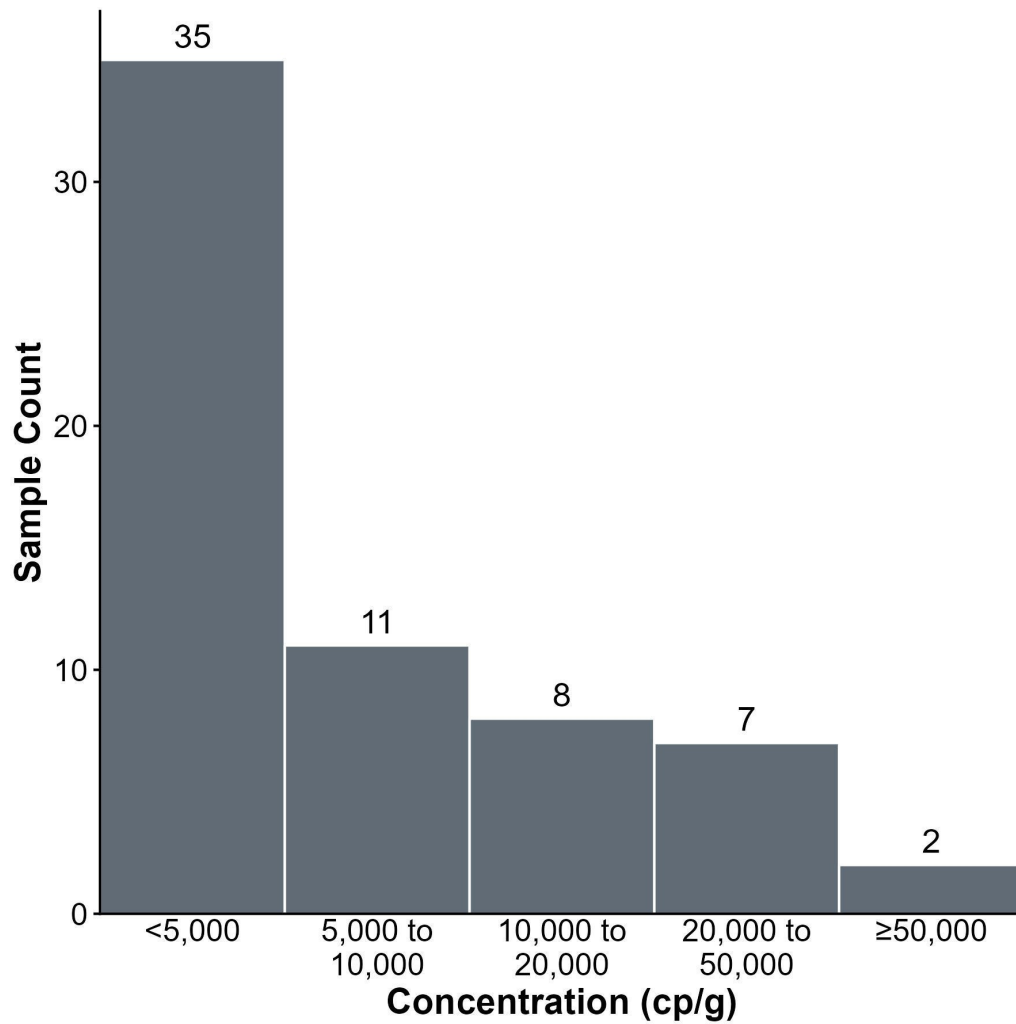

Figure S3. Histogram of measured concentrations of measles virus over the course of the study. The number above the column is the count of samples (out of 11,598) falling within the designated concentration range. Samples not included are those less than the lower detection limit (approximately 1,000 copies per g dry weight (cp/g)).

# Environmental Microbiology Minimum Information Checklist

|                                                                                                      |                                                               |                                                                                                |                                                                                                                                  |                                                                                                   |                                                                                                  |                                                                                                                        |                                                |
|------------------------------------------------------------------------------------------------------|---------------------------------------------------------------|------------------------------------------------------------------------------------------------|----------------------------------------------------------------------------------------------------------------------------------|---------------------------------------------------------------------------------------------------|--------------------------------------------------------------------------------------------------|------------------------------------------------------------------------------------------------------------------------|------------------------------------------------|
| <b>Study Description</b><br>Study: WWSCAN Measles<br>Date: July 2025<br>Completed by: Abigail Paulos | <b>Environmental Sampling</b><br>Described in methods section | <b>Sample Treatment</b><br><input type="checkbox"/> Performed<br>No sample treatment performed | <b>Sample Reduction</b><br><input checked="" type="checkbox"/> Performed<br>Centrifugation was used, as described in the methods | <b>Nucleic Acid Extraction</b><br>Methods provided in paper.<br>Note that 6 replicates were done. | <b>Reverse Transcription</b><br><input checked="" type="checkbox"/> Performed<br>One Step RT-PCR | <b>PCR Detection</b><br><input type="checkbox"/> qPCR <input checked="" type="checkbox"/> dPCR<br>All methods provided | <b>Analysis</b><br>Provided in methods section |
|------------------------------------------------------------------------------------------------------|---------------------------------------------------------------|------------------------------------------------------------------------------------------------|----------------------------------------------------------------------------------------------------------------------------------|---------------------------------------------------------------------------------------------------|--------------------------------------------------------------------------------------------------|------------------------------------------------------------------------------------------------------------------------|------------------------------------------------|

|                          |                                                                                                                                                                       |                                     |                          |                                     |                                     |                                     |                                     |                                     |                                                                             |
|--------------------------|-----------------------------------------------------------------------------------------------------------------------------------------------------------------------|-------------------------------------|--------------------------|-------------------------------------|-------------------------------------|-------------------------------------|-------------------------------------|-------------------------------------|-----------------------------------------------------------------------------|
| <b>Control Checklist</b> | Step performed                                                                                                                                                        | <input checked="" type="checkbox"/> | <input type="checkbox"/> | <input checked="" type="checkbox"/> | <input checked="" type="checkbox"/> | <input checked="" type="checkbox"/> | <input checked="" type="checkbox"/> |                                     |                                                                             |
|                          | Step has control info<br># control replicates<br>Control result reported<br>Data handling reported                                                                    | <input type="checkbox"/>            | <input type="checkbox"/> | <input type="checkbox"/>            | <input checked="" type="checkbox"/> | <input checked="" type="checkbox"/> | <input checked="" type="checkbox"/> | <input checked="" type="checkbox"/> | <b>Negative Controls</b><br>0<br>2<br>2<br>2                                |
|                          | Control introduced<br>Internal/External<br>Independent/Parallel<br>Step has control info<br># control replicates<br>Control result reported<br>Data Handling reported | <input type="checkbox"/>            | <input type="checkbox"/> | <input checked="" type="checkbox"/> | <input type="checkbox"/>            | <input type="checkbox"/>            | <input type="checkbox"/>            | <input type="checkbox"/>            | <b>Positive Controls</b><br>N/A<br>N/A<br>N/A<br>0<br>0<br>6<br>1<br>1<br>1 |

|                                                                                                                                                                                                                                                                                                                                                                                                                                                                                                                                                                                                                                                                                                                                                                                                                                            |                                                                                                                                                                                                                                                                                                                                                                                                                                                                                                                                                                                                                                      |                                                                                                                                                                                                                                                                                                                                                                                                                                                                                                                                                                                                                                                                                                                                                                                                                                                                                                                                                                                                                                                                                                                                                                                                        |
|--------------------------------------------------------------------------------------------------------------------------------------------------------------------------------------------------------------------------------------------------------------------------------------------------------------------------------------------------------------------------------------------------------------------------------------------------------------------------------------------------------------------------------------------------------------------------------------------------------------------------------------------------------------------------------------------------------------------------------------------------------------------------------------------------------------------------------------------|--------------------------------------------------------------------------------------------------------------------------------------------------------------------------------------------------------------------------------------------------------------------------------------------------------------------------------------------------------------------------------------------------------------------------------------------------------------------------------------------------------------------------------------------------------------------------------------------------------------------------------------|--------------------------------------------------------------------------------------------------------------------------------------------------------------------------------------------------------------------------------------------------------------------------------------------------------------------------------------------------------------------------------------------------------------------------------------------------------------------------------------------------------------------------------------------------------------------------------------------------------------------------------------------------------------------------------------------------------------------------------------------------------------------------------------------------------------------------------------------------------------------------------------------------------------------------------------------------------------------------------------------------------------------------------------------------------------------------------------------------------------------------------------------------------------------------------------------------------|
| <b>Environmental Sampling</b> <ul style="list-style-type: none"> <li><input checked="" type="checkbox"/> Sampling Procedure</li> <li><input checked="" type="checkbox"/> Number of samples</li> <li><input checked="" type="checkbox"/> Sample amount, mean, range</li> <li><input checked="" type="checkbox"/> Sampling locations, dates, times</li> </ul>                                                                                                                                                                                                                                                                                                                                                                                                                                                                                | <b>Sample Reduction</b> <ul style="list-style-type: none"> <li><input checked="" type="checkbox"/> Performed</li> <li><input checked="" type="checkbox"/> Reduction procedure</li> <li><input type="checkbox"/> Reagents</li> <li><input type="checkbox"/> Concentration Factor</li> </ul>                                                                                                                                                                                                                                                                                                                                           | <b>qPCR or dPCR</b> <ul style="list-style-type: none"> <li><input checked="" type="checkbox"/> Target gene name, amplicon length</li> <li><input checked="" type="checkbox"/> Thermocycling temperatures and times</li> <li><input checked="" type="checkbox"/> Master mix: composition, vendors, concentrations</li> <li><input checked="" type="checkbox"/> Additives: vendors, concentrations</li> <li><input checked="" type="checkbox"/> Template amount added, pre-treatment (if any)</li> <li><input checked="" type="checkbox"/> Primers: sequences, concentrations, vendors, references</li> <li><input checked="" type="checkbox"/> Amplicon confirmation method (probe, melt curve, etc)</li> <li><input checked="" type="checkbox"/> Probe sequence, concentration, vendor, reference</li> <li><input checked="" type="checkbox"/> Instrumentation</li> <li><input type="checkbox"/> Equivalent volume of sample analyzed by PCR</li> <li><input checked="" type="checkbox"/> Inhibition assessment procedure</li> <li><input checked="" type="checkbox"/> Inhibition control description (if used)</li> <li><input type="checkbox"/> Number samples tested and found inhibited</li> </ul> |
| <b>Sample Treatment</b> <ul style="list-style-type: none"> <li><input type="checkbox"/> Performed</li> <li><input type="checkbox"/> Treatment procedure</li> <li><input type="checkbox"/> Reagents</li> </ul>                                                                                                                                                                                                                                                                                                                                                                                                                                                                                                                                                                                                                              | <b>Nucleic Acid Extraction</b> <ul style="list-style-type: none"> <li><input checked="" type="checkbox"/> Extraction procedure</li> <li><input checked="" type="checkbox"/> Amount extracted, amount obtained</li> <li><input checked="" type="checkbox"/> Extract storage conditions</li> </ul>                                                                                                                                                                                                                                                                                                                                     | <b>Analysis – dPCR</b> <ul style="list-style-type: none"> <li><input checked="" type="checkbox"/> Threshold settings</li> <li><input checked="" type="checkbox"/> Technical replicates, number, well merging</li> <li><input checked="" type="checkbox"/> Partitions measured, number, mean, variance</li> <li><input checked="" type="checkbox"/> Partition volume</li> <li><input checked="" type="checkbox"/> Target copies per partition, mean, variance</li> <li><input checked="" type="checkbox"/> Program used for dPCR analysis</li> <li><input checked="" type="checkbox"/> Explanation of control results, example plots</li> </ul>                                                                                                                                                                                                                                                                                                                                                                                                                                                                                                                                                         |
| <b>Reverse Transcription</b> <ul style="list-style-type: none"> <li><input checked="" type="checkbox"/> Performed</li> <li><input checked="" type="checkbox"/> One or two step</li> <li><input type="checkbox"/> cDNA storage conditions (if two step)</li> <li><input checked="" type="checkbox"/> Reaction temperatures and times</li> <li><input checked="" type="checkbox"/> Reaction reagents and concentrations</li> <li><input checked="" type="checkbox"/> Priming method</li> <li><input checked="" type="checkbox"/> Reaction volume, added template amount</li> <li><input checked="" type="checkbox"/> Inhibition assessment procedure</li> <li><input checked="" type="checkbox"/> Inhibition control description (if used)</li> <li><input checked="" type="checkbox"/> Number samples tested and found inhibited</li> </ul> | <b>Analysis – qPCR</b> <ul style="list-style-type: none"> <li><input type="checkbox"/> Method for handling failed negative controls</li> <li><input type="checkbox"/> Technical replicates, number, calculations</li> <li><input type="checkbox"/> Calibration standards: description and source</li> <li><input type="checkbox"/> Method of quantifying standards</li> <li><input type="checkbox"/> Calibration curve slope</li> <li><input type="checkbox"/> Calibration curve R2</li> <li><input type="checkbox"/> Lowest standard measured or 95% LOD</li> <li><input type="checkbox"/> Cq value determination method</li> </ul> |                                                                                                                                                                                                                                                                                                                                                                                                                                                                                                                                                                                                                                                                                                                                                                                                                                                                                                                                                                                                                                                                                                                                                                                                        |

Figure S4. EMMI Checklist for study.

### Adjacent county analysis.

In addition to the primary analysis using cases reported in the WWTP counties, we also identified counties adjacent to each WWTP's sewershed, which was defined as any county within 1000 m of a sewershed boundary not directly served by the WWTP. 153 cases were reported in counties served by or adjacent to WWSCAN plants with a measles detection, and 67 cases in counties served by or adjacent to WWSCAN plants without a measles detection. 26 (41%) of detections were within 7 days of a case in the same or adjacent county and 49 (78%) within 30 days. Wastewater detections were associated with clinical cases in the WWTP and adjacent counties, although with lower odds ratios than when considering cases in the WWTP county alone (Table S3).

Table S3. Odds ratios of clinical cases in the WWTP county or adjacent counties.

| county                     | Time period                            | Odds ratio | 5% lower bound | 95% upper bound | p        | Adjusted p value |
|----------------------------|----------------------------------------|------------|----------------|-----------------|----------|------------------|
| WWTP county                | Following 7 days                       | 13.77      | 7.37           | 24.32           | 4.30E-18 | 4.30E-17         |
| WWTP county                | Within 7 days                          | 14.71      | 8.60           | 24.57           | 5.60E-24 | 5.60E-23         |
| WWTP county                | Following 30 days                      | 8.91       | 5.29           | 14.75           | 4.10E-17 | 4.10E-16         |
| WWTP county                | Within 30 days                         | 15.95      | 9.57           | 27.30           | 2.20E-25 | 2.20E-24         |
| WWTP county                | Number of cases in surrounding 30 days | 2.00       | 1.76           | 2.27            | 1.00E-27 | 1.00E-26         |
| WWTP and adjacent counties | Following 7 days                       | 7.10       | 3.99           | 12.13           | 3.60E-12 | 3.60E-11         |
| WWTP and adjacent counties | Within 7 days                          | 7.85       | 4.69           | 12.96           | 1.50E-15 | 1.50E-14         |
| WWTP and adjacent counties | Following 30 days                      | 5.05       | 3.05           | 8.30            | 1.90E-10 | 1.90E-09         |
| WWTP and adjacent counties | Within 30 days                         | 13.41      | 7.60           | 25.27           | 1.30E-17 | 1.30E-16         |
| WWTP and adjacent counties | Number of cases in surrounding 30 days | 1.02       | 0.99           | 1.03            | 0.15     | 1                |

## References

1. Boehm AB, Wolfe MK, Bidwell AL, Zulli A, White BJ, Shelden B, et al. Pathogen nucleic acids data in wastewater solids from 147 treatment plants in the United States: 2024–2025. *Data Brief*. 2026 Apr 1;65:112503. doi:10.1016/j.dib.2026.112503
